# Supplementary material
Source: PubMed Central journal article supplement (PMC7116900)

Gel source data for Figure 3 d

Molecular weight marker

kDa

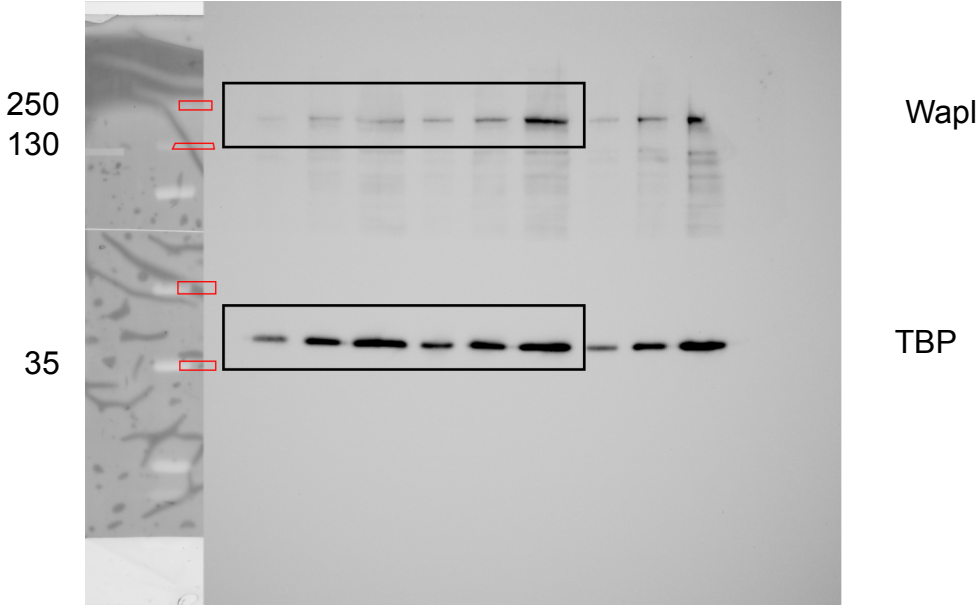

Molecular weight marker

kDa

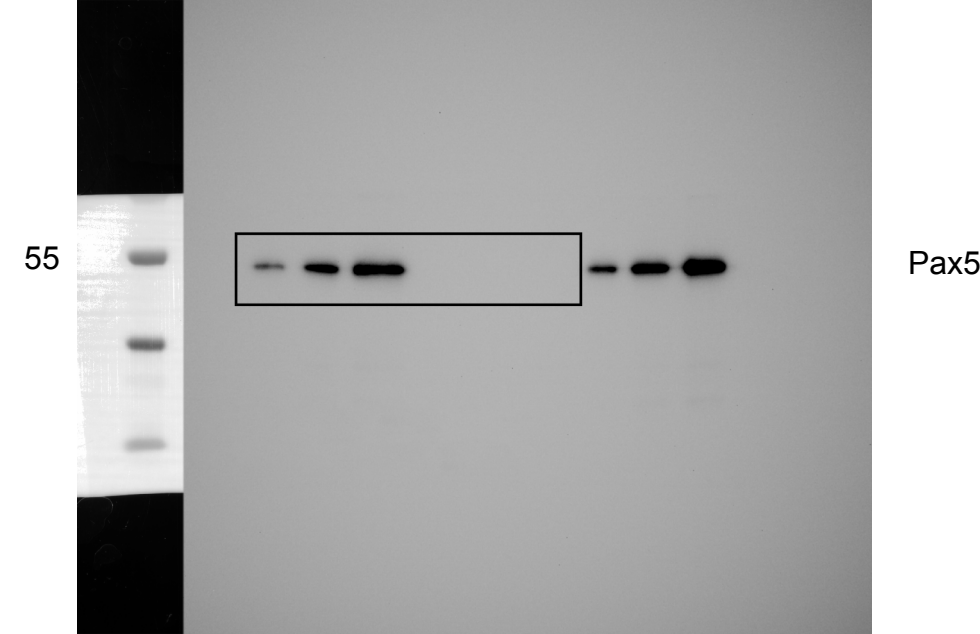

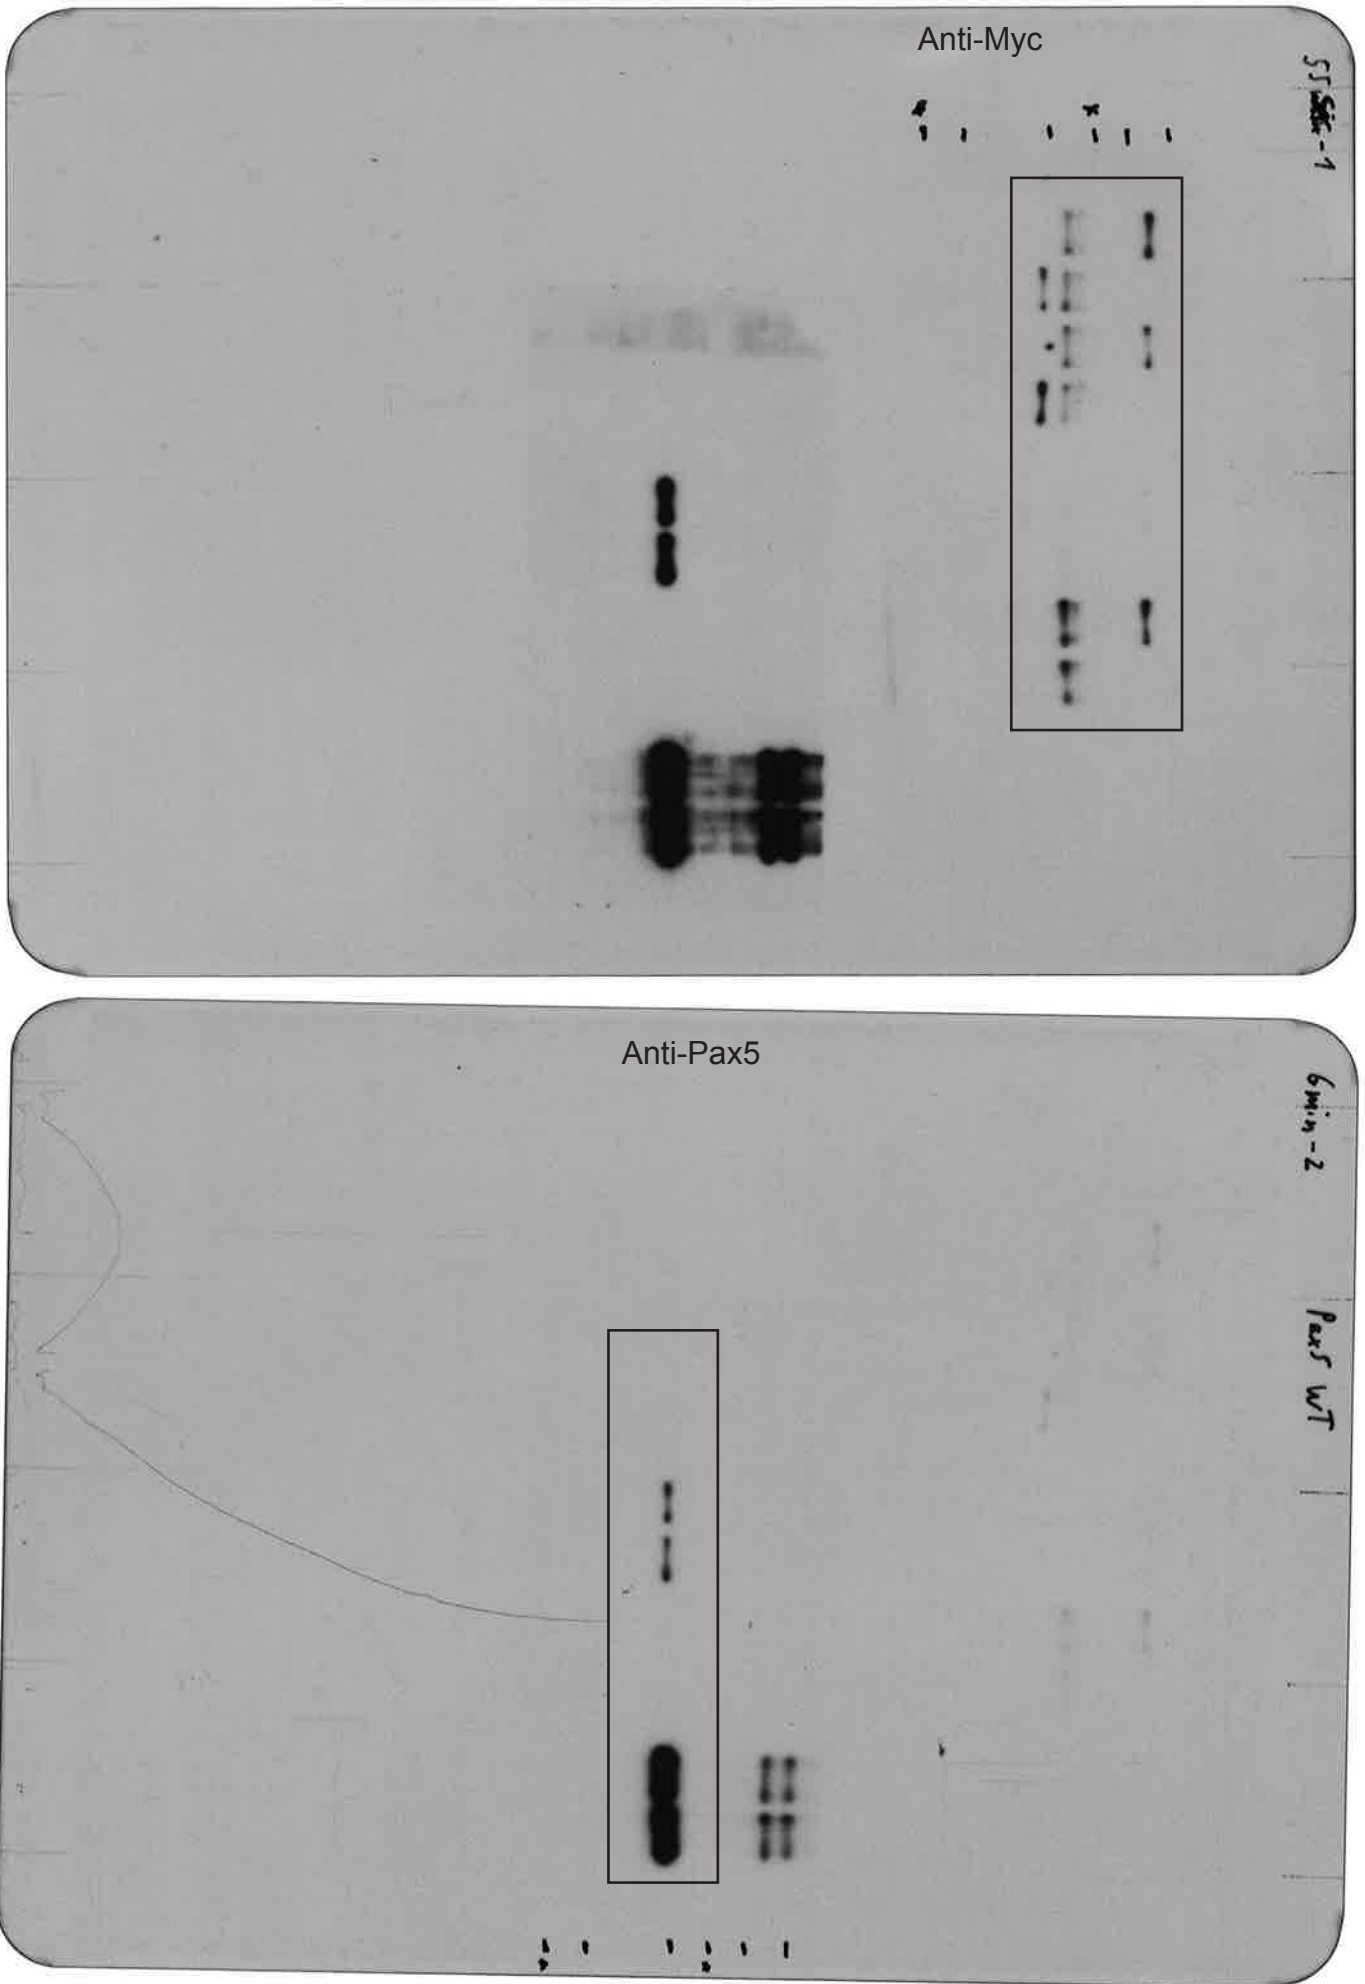

Supplementary Figure 1 (Hill et al.)

Gel source data for Extended Data Figure 5 b

Molecular weight marker

kDa

250

130

35

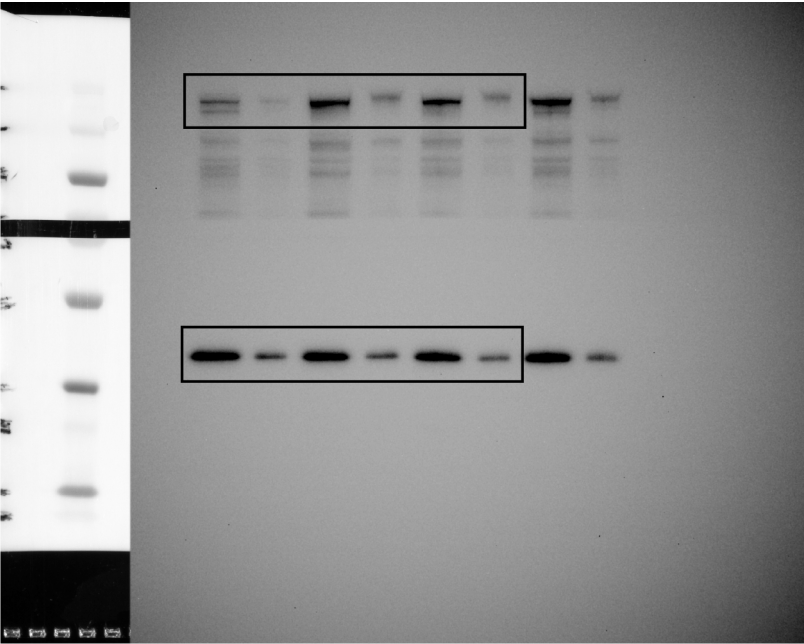

Wapl

TBP

Gel source data for Extended Data Figure 5 d

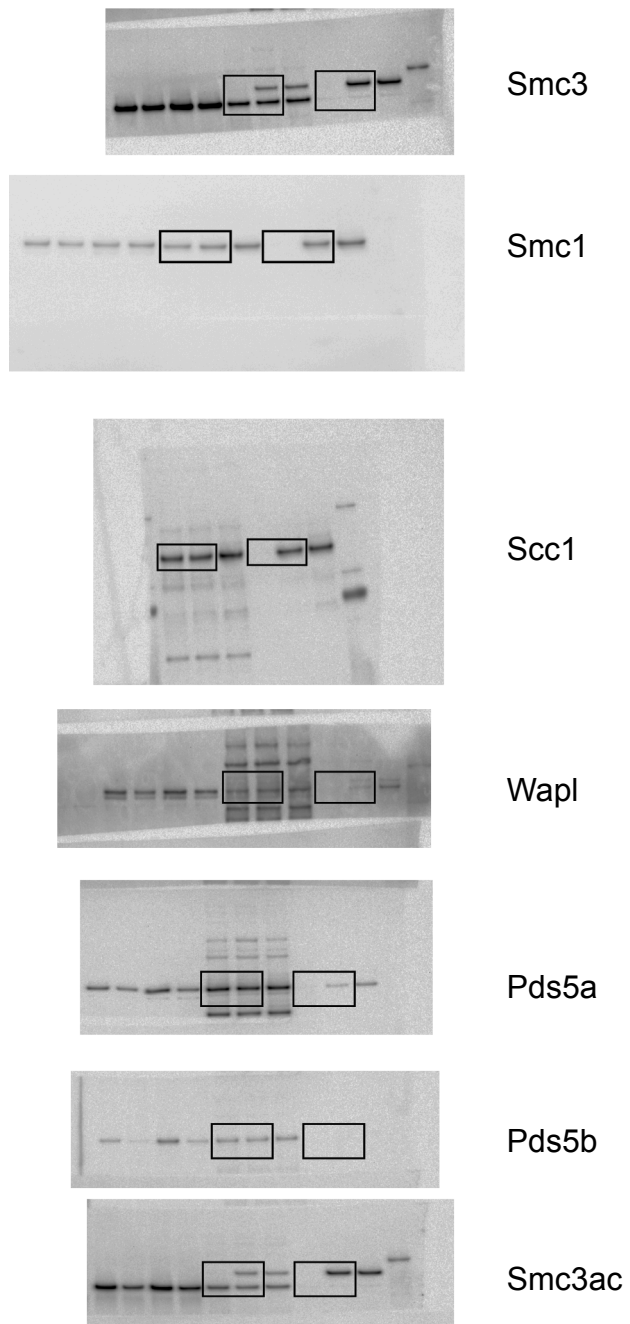

Gel source data for Extended Data Figure 6 d

Molecular size marker

kDa

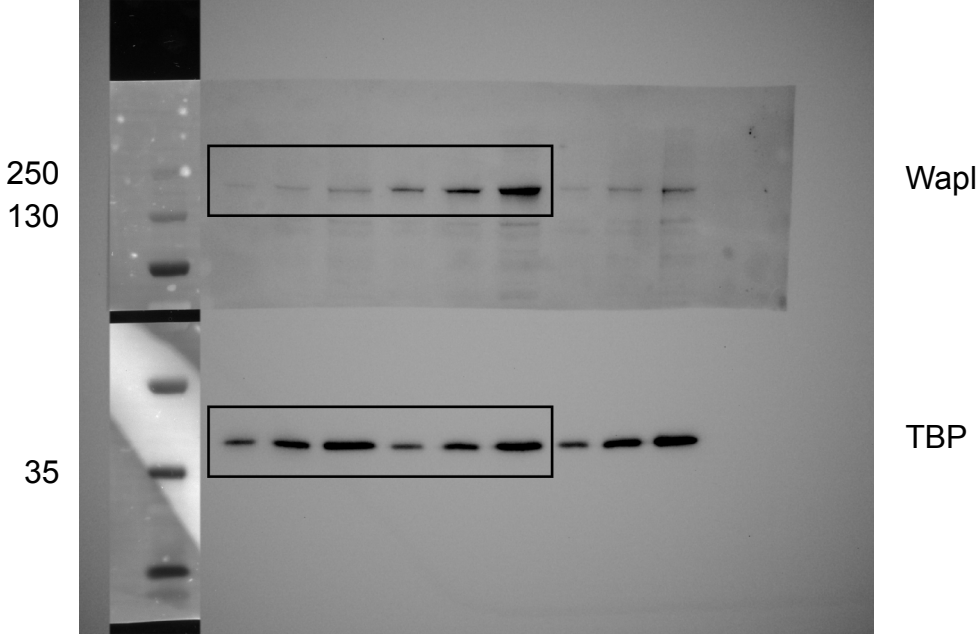

# Gating strategies used for cell sorting

## Sorting of immature IgM<sup>b</sup> B cells from bone marrow

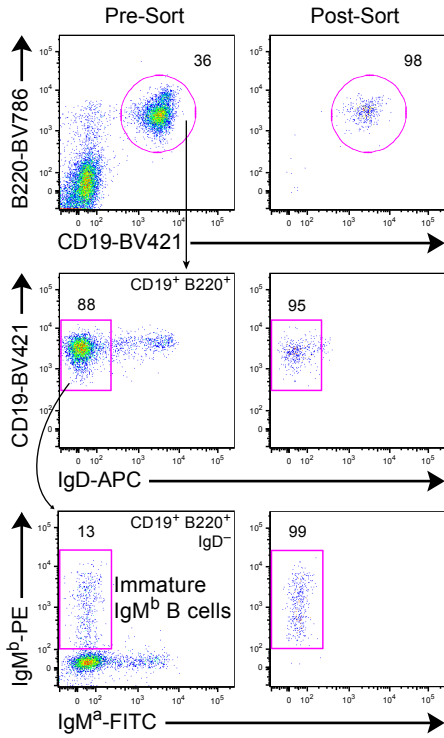

## Sorting of pro-B and pre-B cells from bone marrow

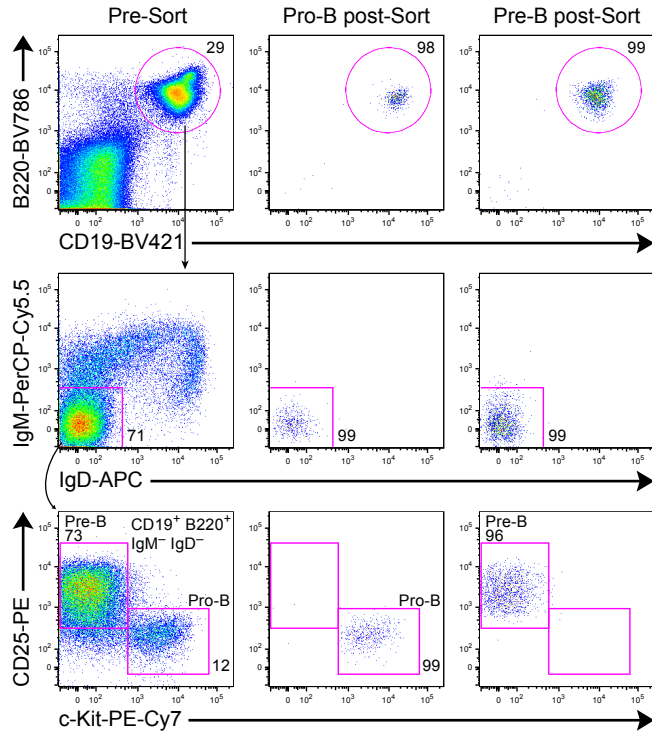

## Sorting of Pax5-deficient progenitors from bone marrow

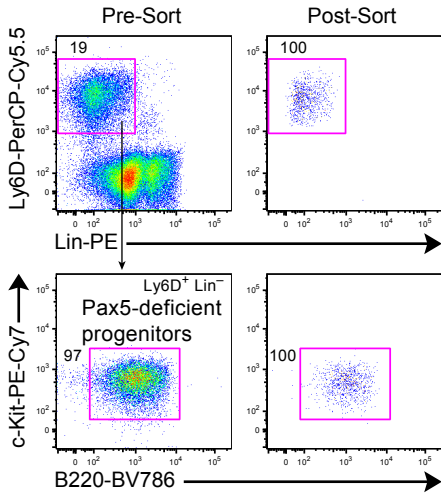

## Sorting of T cell populations from spleen

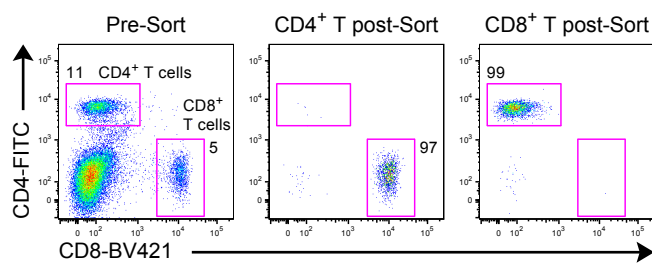

## Sorting of T cell populations from thymus

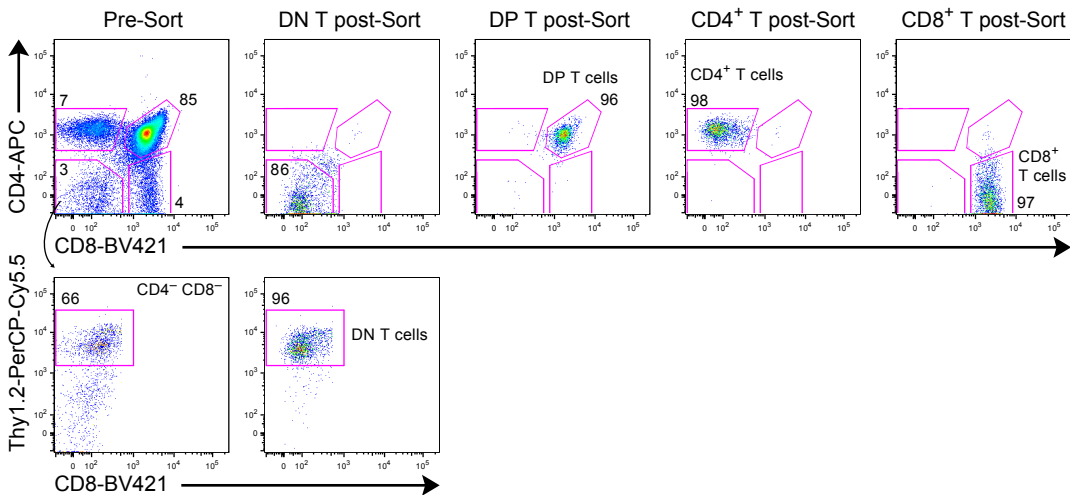

Supplement: EMS117807-supplement-Supplementary_Figure_1.pdf [file EMS117807-supplement-Supplementary_Figure_1.pdf]
